# Supplementary material for: A high-throughput yeast display approach to profile pathogen proteomes for MHC-II binding
Source: bioRxiv or medRxiv preprint supplement (doi:10.1101/2022.02.22.480950), 2022-03-11
Supplement: Supplementary file [file media-2.pdf]

## **Supplemental Information**

Supplemental Figures 1-7 (this document)

Supplemental Data (provided .xlsx file). Peptides and read counts for defined libraries and inferred registers for enriched peptides.

|         |     | Doped |       |       |       |       | Undoped |       |       |       |      |       |       |
|---------|-----|-------|-------|-------|-------|-------|---------|-------|-------|-------|------|-------|-------|
|         |     | R0    | R1    | R2    | R3    | R4    | R0      | R1+   | R1-   | R2+   | R2-  | R3+   | R3-   |
| Doped   | R0  | 1.00  | 0.16  | 0.16  | 0.16  | 0.16  | 0.09    | 0.18  | -0.03 | 0.18  | 0.11 | 0.16  | 0.16  |
|         | R1  | 0.16  | 1.00  | 0.91  | 0.86  | 0.75  | 0.24    | 0.76  | -0.30 | 0.78  | 0.42 | 0.72  | 0.72  |
|         | R2  | 0.16  | 0.91  | 1.00  | 0.95  | 0.85  | 0.21    | 0.79  | -0.35 | 0.86  | 0.37 | 0.81  | 0.76  |
|         | R3  | 0.16  | 0.86  | 0.95  | 1.00  | 0.94  | 0.17    | 0.75  | -0.37 | 0.89  | 0.25 | 0.88  | 0.69  |
|         | R4  | 0.16  | 0.75  | 0.85  | 0.94  | 1.00  | 0.13    | 0.65  | -0.34 | 0.84  | 0.11 | 0.90  | 0.53  |
| Undoped | R0  | 0.09  | 0.24  | 0.21  | 0.17  | 0.13  | 1.00    | 0.36  | 0.41  | 0.21  | 0.42 | 0.16  | 0.27  |
|         | R1+ | 0.18  | 0.76  | 0.79  | 0.75  | 0.65  | 0.36    | 1.00  | -0.27 | 0.86  | 0.66 | 0.76  | 0.87  |
|         | R1- | -0.03 | -0.30 | -0.35 | -0.37 | -0.34 | 0.41    | -0.27 | 1.00  | -0.40 | 0.04 | -0.38 | -0.32 |
|         | R2+ | 0.18  | 0.78  | 0.86  | 0.89  | 0.84  | 0.21    | 0.86  | -0.40 | 1.00  | 0.34 | 0.94  | 0.81  |
|         | R2- | 0.11  | 0.42  | 0.37  | 0.25  | 0.11  | 0.42    | 0.66  | 0.04  | 0.34  | 1.00 | 0.18  | 0.62  |
|         | R3+ | 0.16  | 0.72  | 0.81  | 0.88  | 0.90  | 0.16    | 0.76  | -0.38 | 0.94  | 0.18 | 1.00  | 0.66  |
|         | R3- | 0.16  | 0.72  | 0.76  | 0.69  | 0.53  | 0.27    | 0.87  | -0.32 | 0.81  | 0.62 | 0.66  | 1.00  |

**Supplemental Figure 1. Correlations between selection rounds.** Pearson correlation for HLA-DR401 SARS-CoV-2 and SARS-CoV defined library members (+/- signs indicate enriched (+) or not enriched (-) yeast in undoped library; rounds of selection are indicated e.g. “R1” indicates “Round 1”, and “R0” is the unselected “Round 0” library).

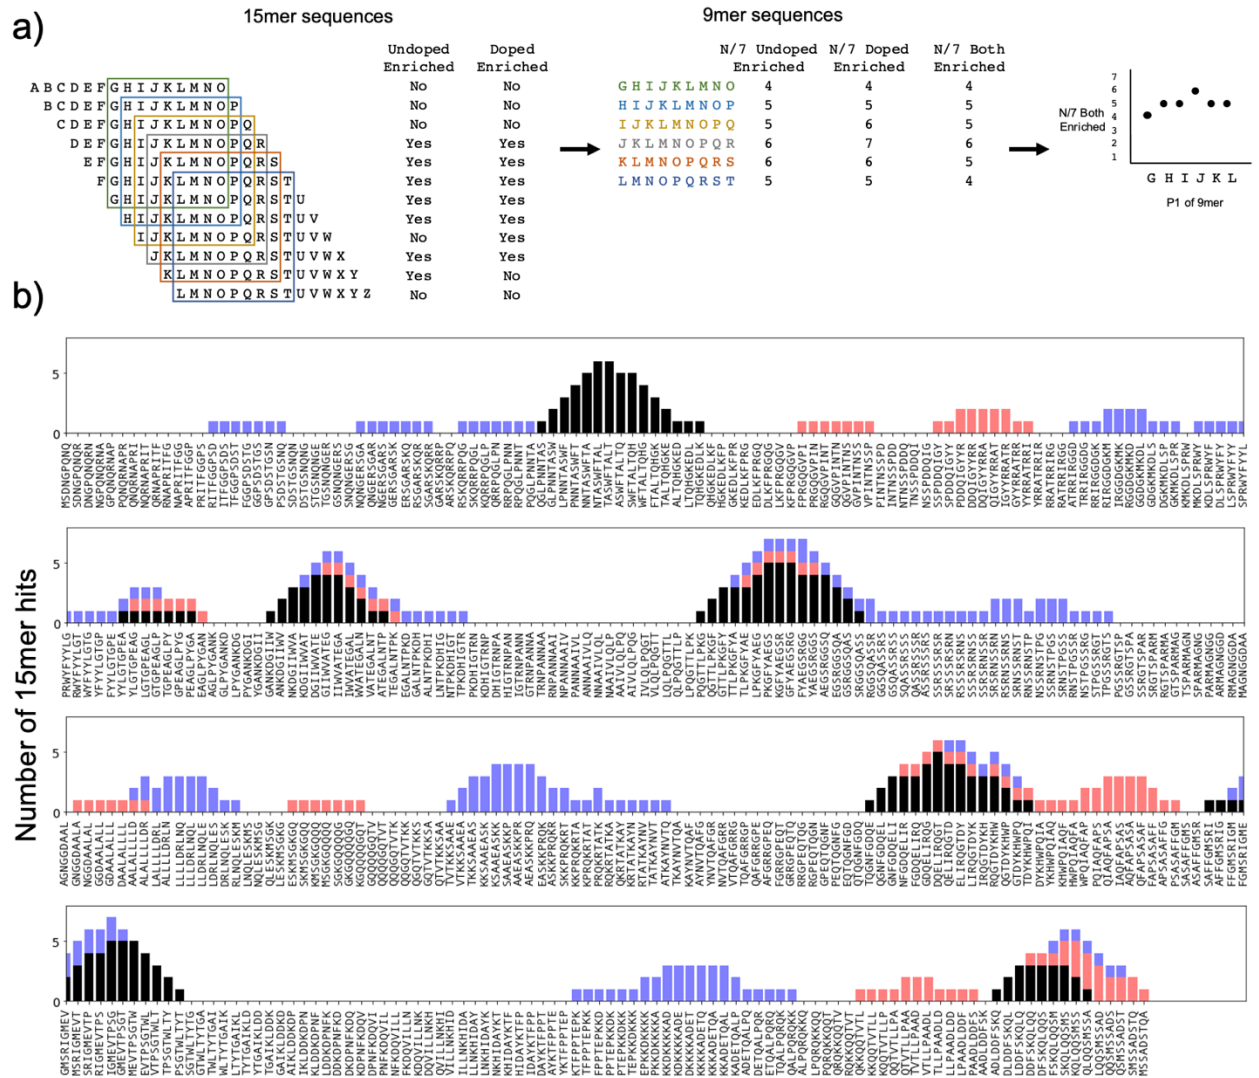

**Supplemental Figure 2. Utilizing overlapping peptides to call high confidence peptides.**  
**a)** Schematic showing use of overlapping 15mers, containing redundant 9mers. Each 9mer is present in seven 15mers; for each 9mer, we calculate how many of these seven 15mers enriched. **b)** Number of peptides containing a given 9mer that are hits, for SARS-CoV-2 nucleocapsid on HLA-DR401. Black=hits in both undoped and doped libraries; blue=hits in undoped library only; red=hits in doped library only. Enrichment categories are stacked, for a maximum of seven 15mer hits, since each 9mer is present in seven 15mers.

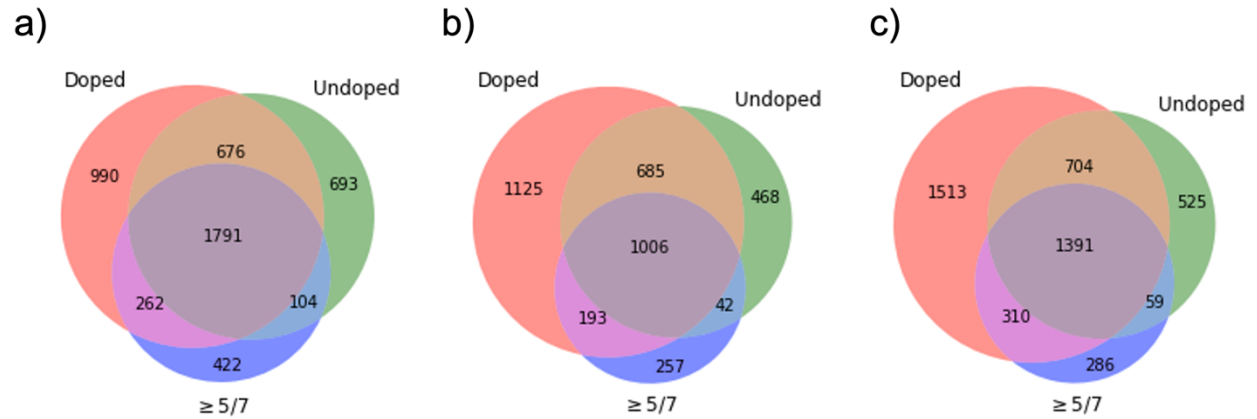

**Supplemental Figure 3. Full Venn diagrams.** Full Venn diagrams showing relationships between peptides which enriched in the doped library (“Doped”), and undoped library (“Undoped”), and contained a 9mer peptide which enriched in five or more of the seven 15mers containing it (“ $\geq 5/7$ ”), for **a)** HLA-DR401, **b)** HLA-DR402, and **c)** HLA-DR404.

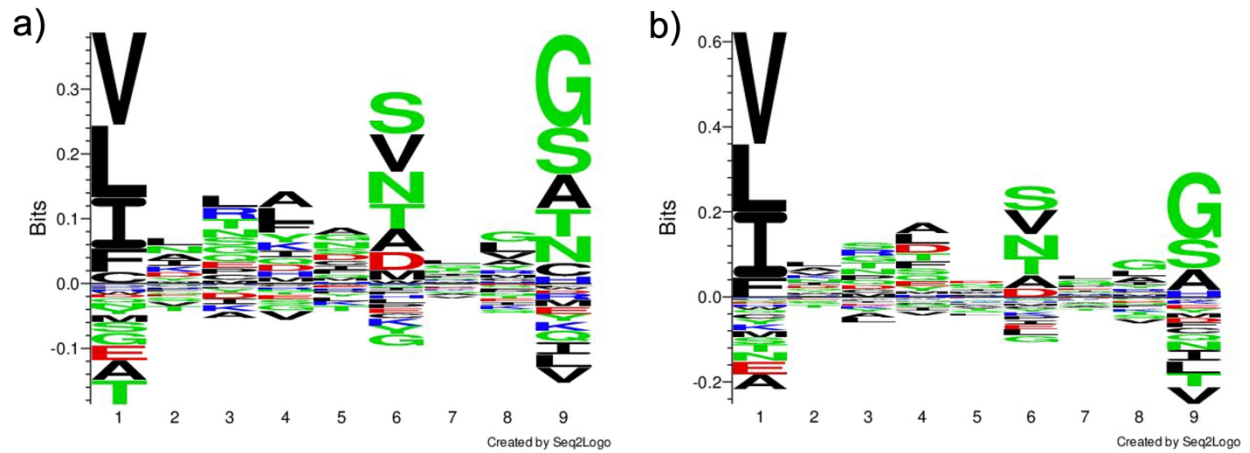

**Supplemental Figure 4. Sequence logo for HLA-DR402 and HLA-DR404. a) HLA-DR402:** Sequence logo of 1,690 peptides that enriched in both doped and undoped selections of the SARS-CoV and SARS-CoV-2 library for HLA-DR402. **b) HLA-DR404:** Sequence logo of 2,094 peptides that enriched in both doped and undoped selections of the SARS-CoV and SARS-CoV-2 library for HLA-DR404. Logos were generated with Seq2Logo-2.0.

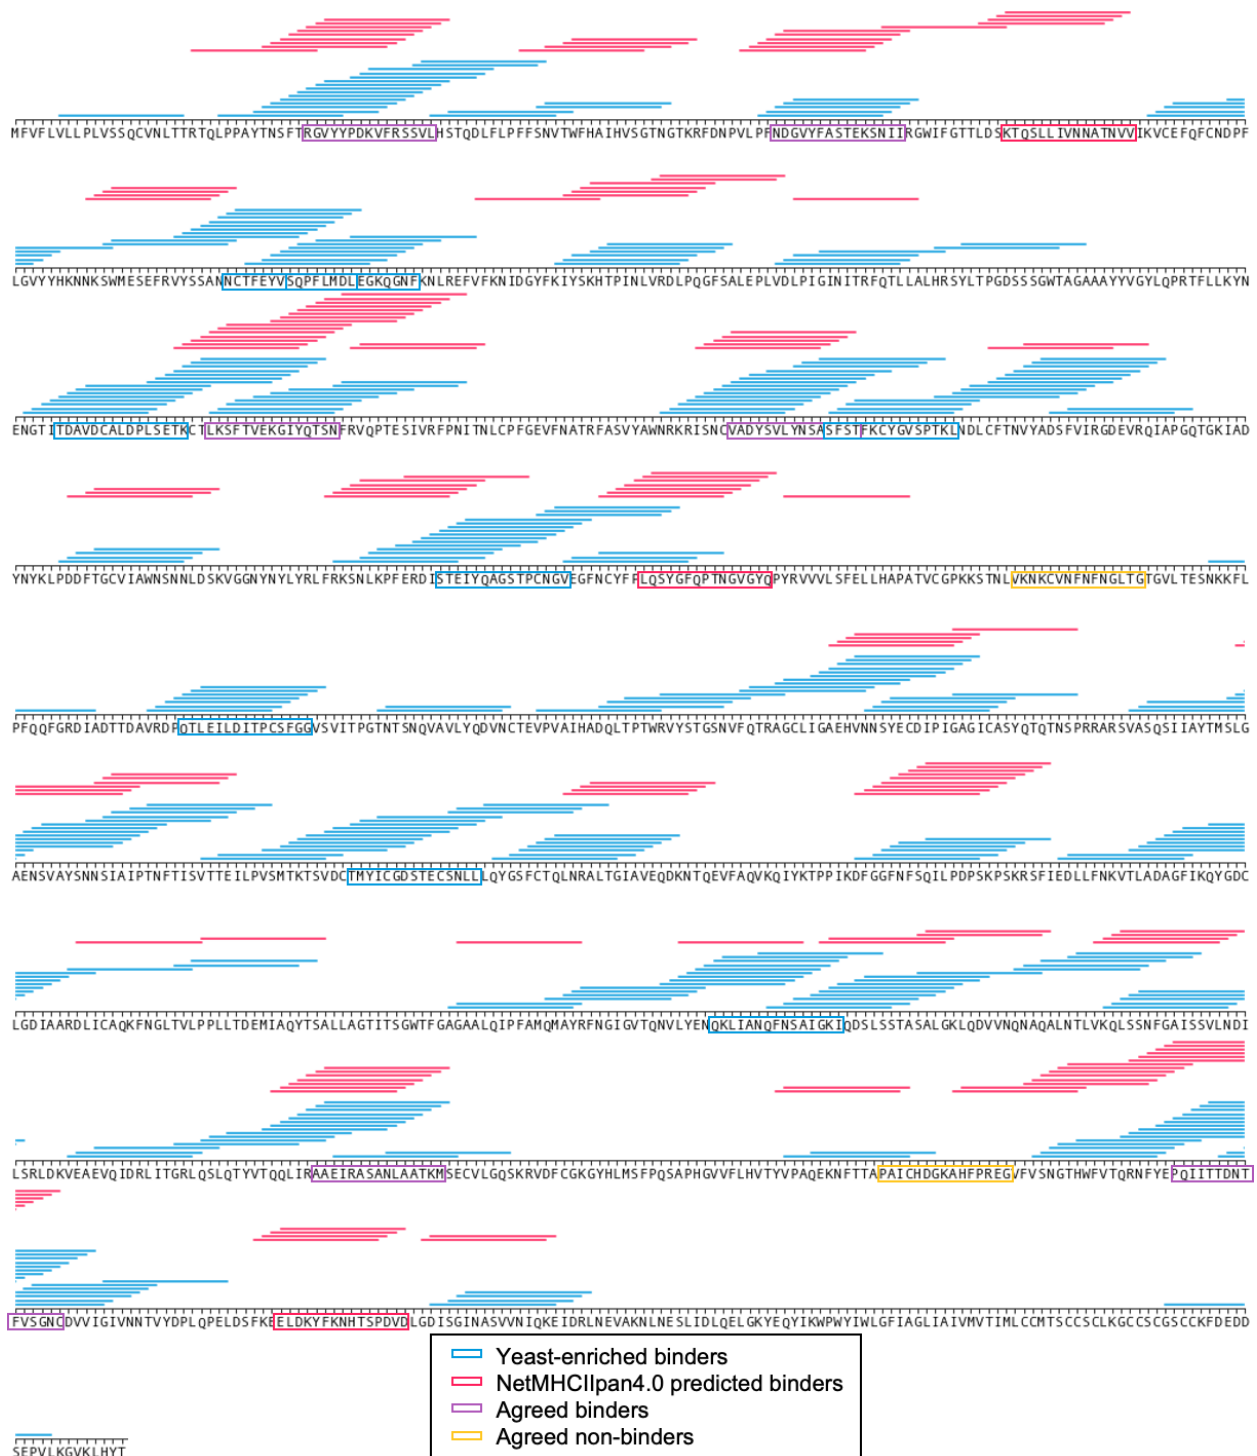

**Supplemental Figure 5. Comparing defined library selection with algorithmic predictions: SARS-CoV-2 spike protein.** 15mer peptides which enriched for binding to HLA-DR401 in both the doped and undoped libraries are indicated with horizontal lines above the enriched 15mer sequence (blue). NetMHCIIpan4.0 predicted binders (rank  $\leq 10\%$ ) on yeast-formatted peptides are shown in red. Boxed sequences are tested in subsequent fluorescent polarization experiments, and colored as indicated in the legend.

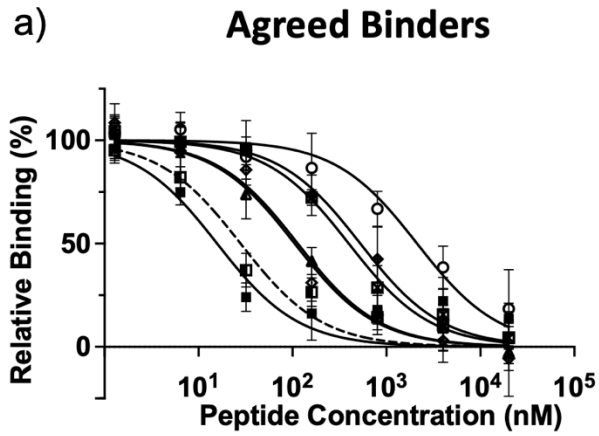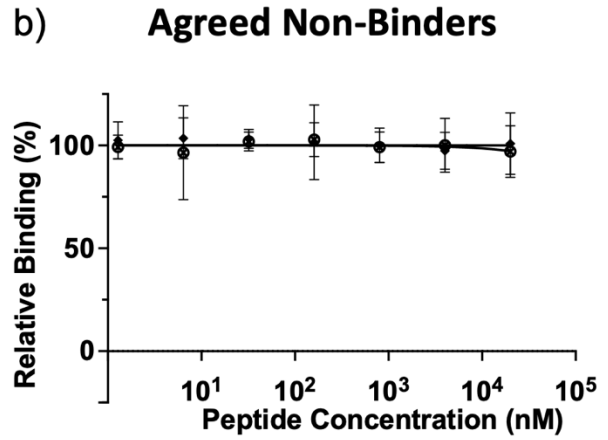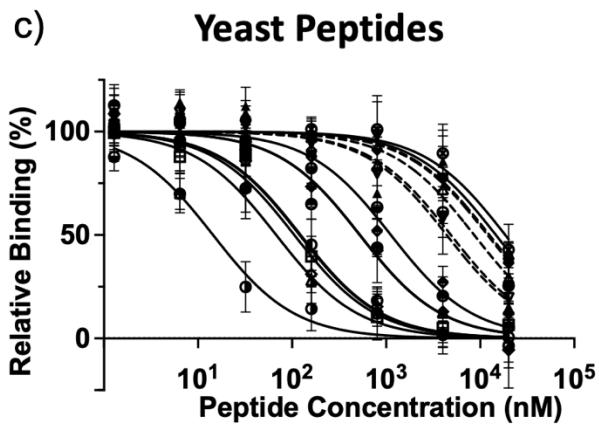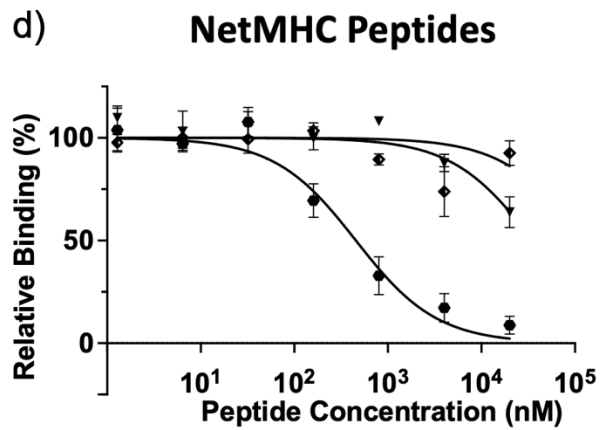

**Supplemental Figure 6. Titration curves for peptides tested via fluorescence polarization for binding to HLA-DR401, by category.** **a)** Agreed binder peptides which are predicted to bind by NetMHCIIpan4.0 and enriched in yeast display experiments. Dashed line is the positive control HA peptide. **b)** Agreed non-binder peptides which did not enrich in yeast display experiments and were not predicted to bind by NetMHCIIpan4.0. **c)** Yeast enriched peptides from Table 2 and Table 3. Offset variants from Table 3 are dashed lines. **d)** NetMHCIIpan4.0 predicted peptides which are not enriched in the yeast display library.

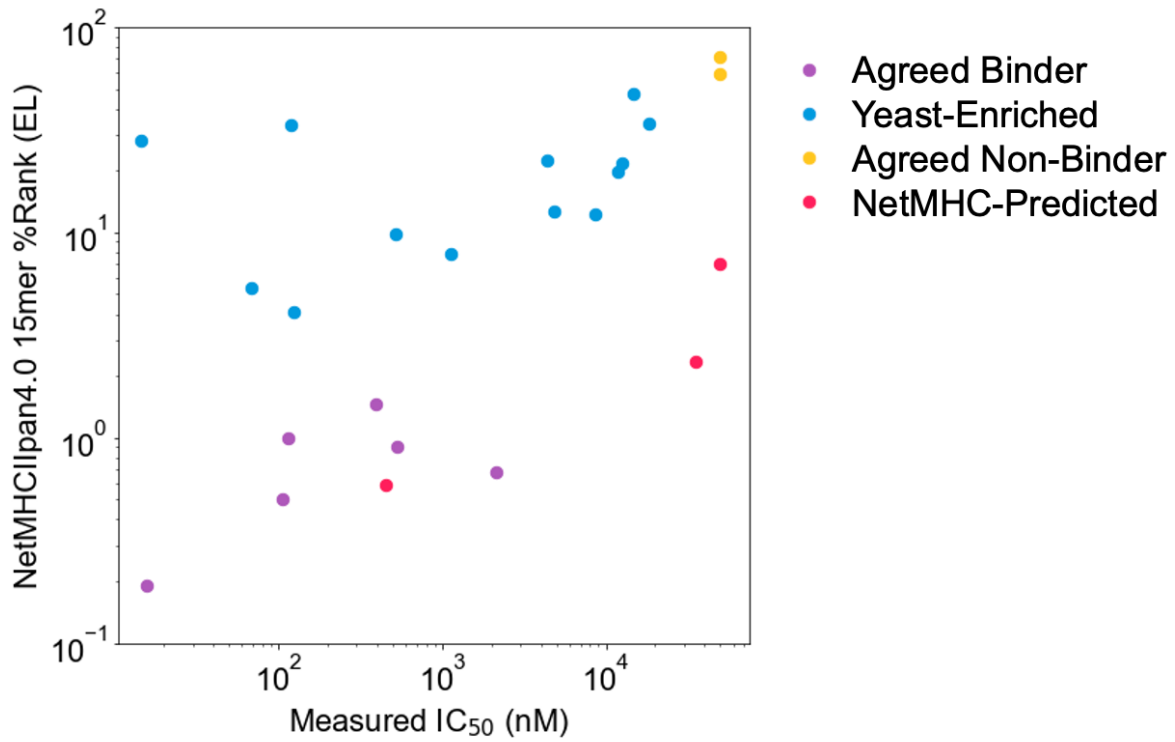

**Supplemental Figure 7. Comparing measured IC<sub>50</sub> values and prediction.** Relationship between measured IC<sub>50</sub> values and NetMHCIIpan4.0 predicted ranks in Eluted Ligand mode (EL) on unflanked (native) 15mer sequences. Data points are colored by label, and IC<sub>50</sub> values  $\geq 50 \mu\text{M}$  are set to  $50 \mu\text{M}$ .
